# Supplementary figures and images for: 4-1BB and optimized CD28 co-stimulation enhances function of human mono-specific and bi-specific third-generation CAR T cells
Source: PubMed Central journal article supplement — J Immunother Cancer. 2021 Oct 26;9(10):e003354. doi: 10.1136/jitc-2021-003354 (PMC8552146; doi:10.1136/jitc-2021-003354), 2021-10-26

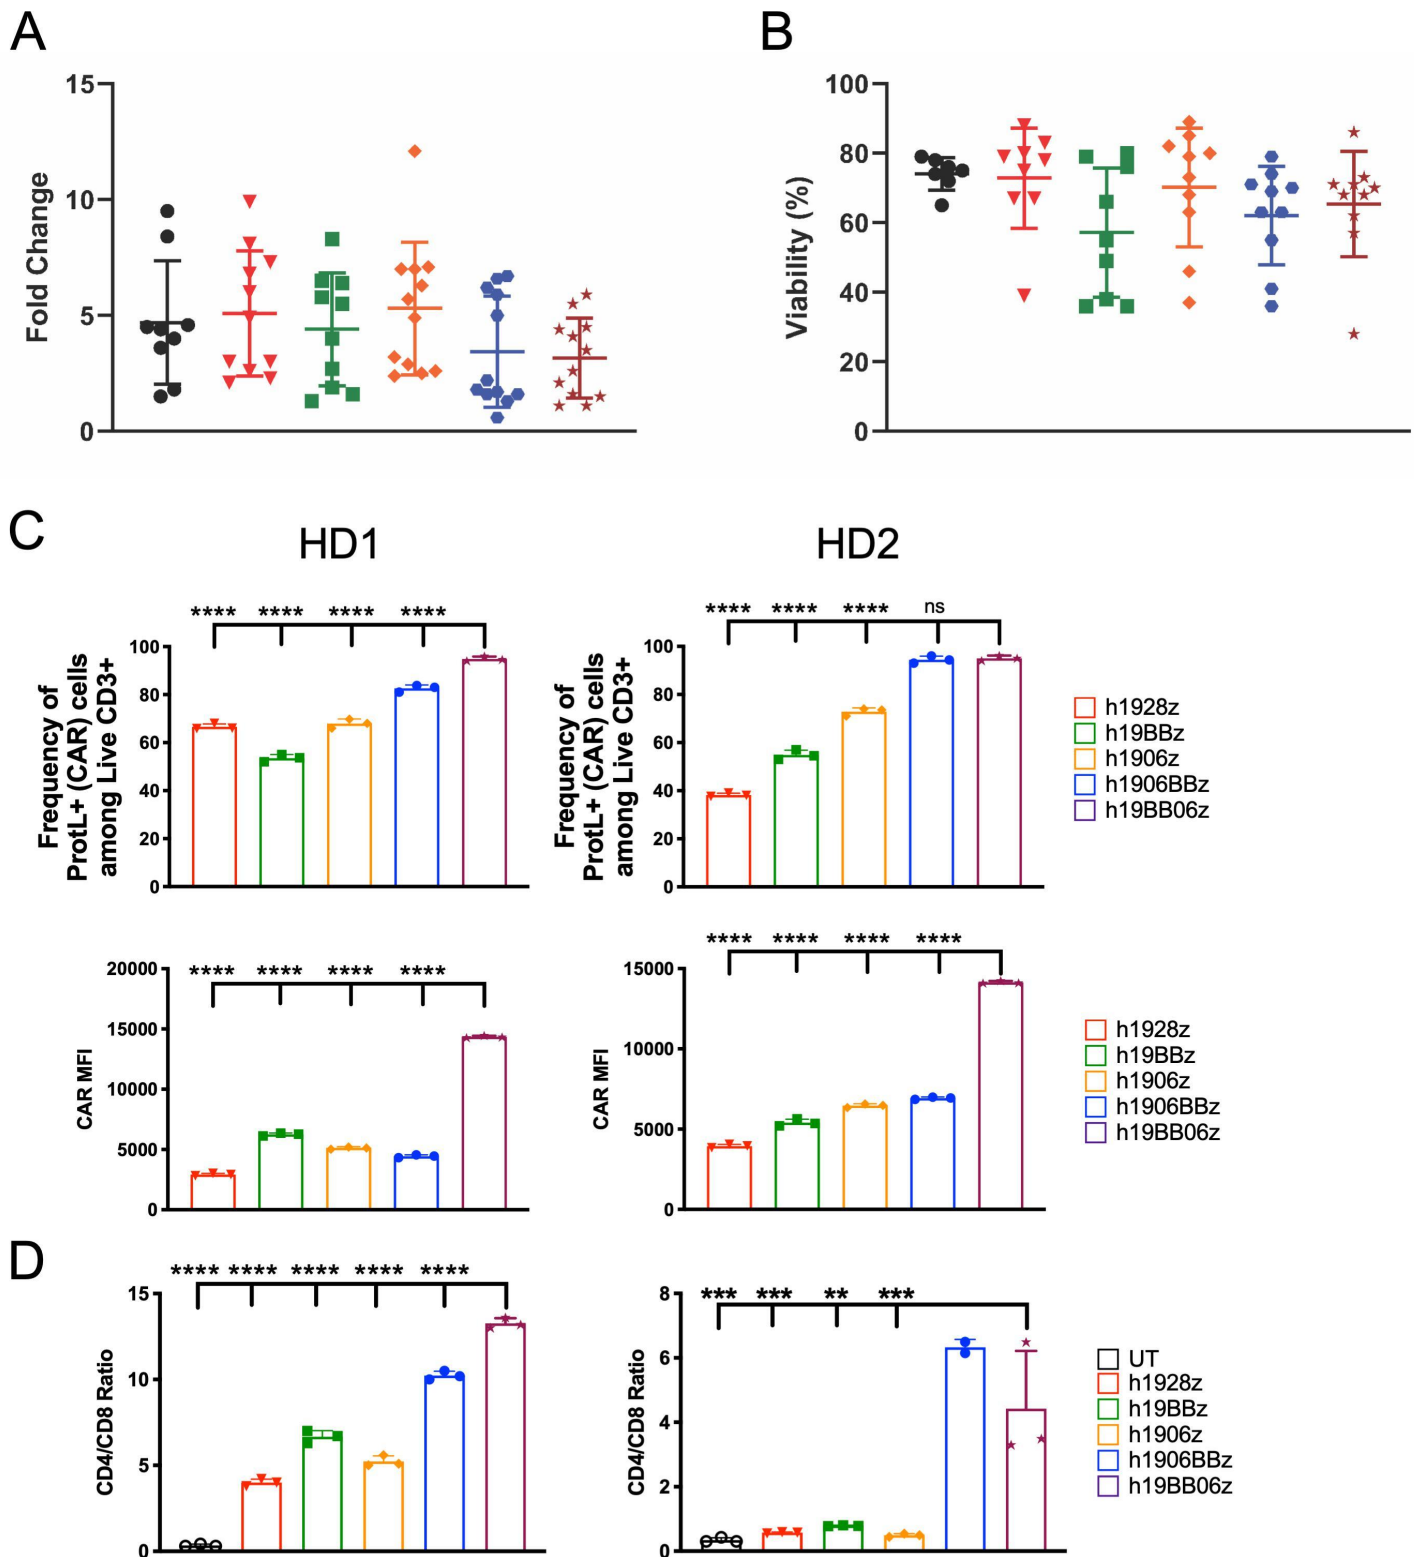

Supplement: jitc-2021-003354supp001.pdf [file jitc-2021-003354supp001.pdf]

**A**

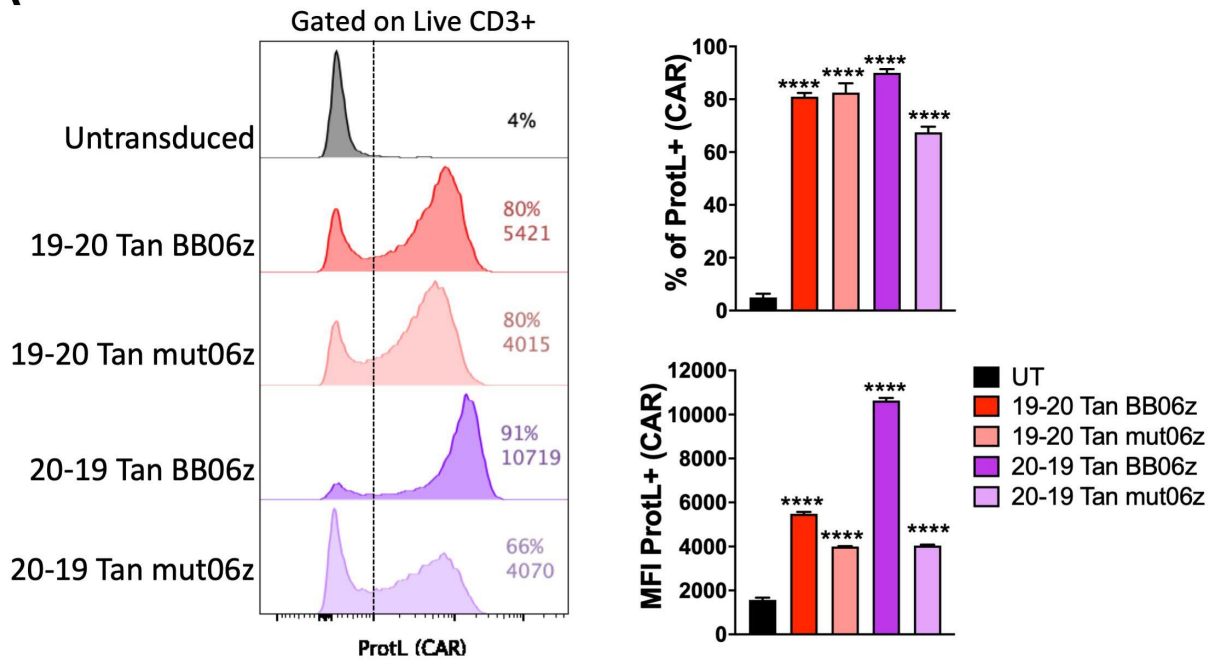

**B**

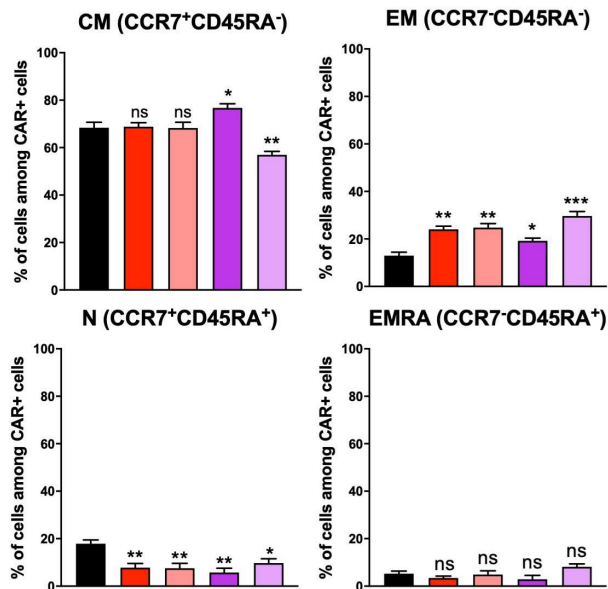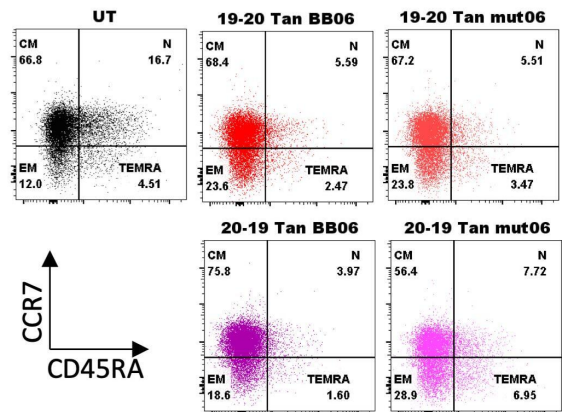

Supplement: jitc-2021-003354supp002.pdf [file jitc-2021-003354supp002.pdf]

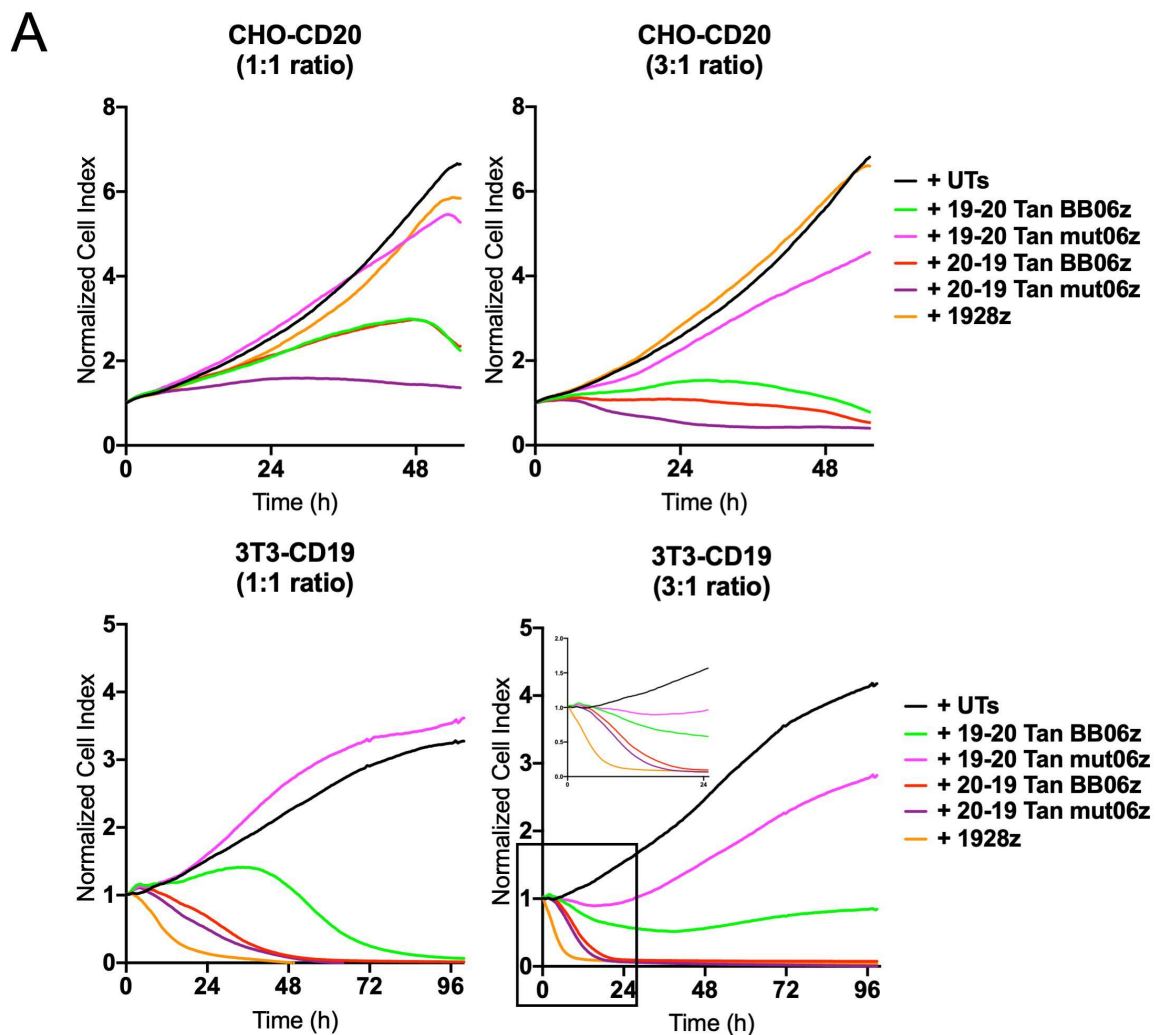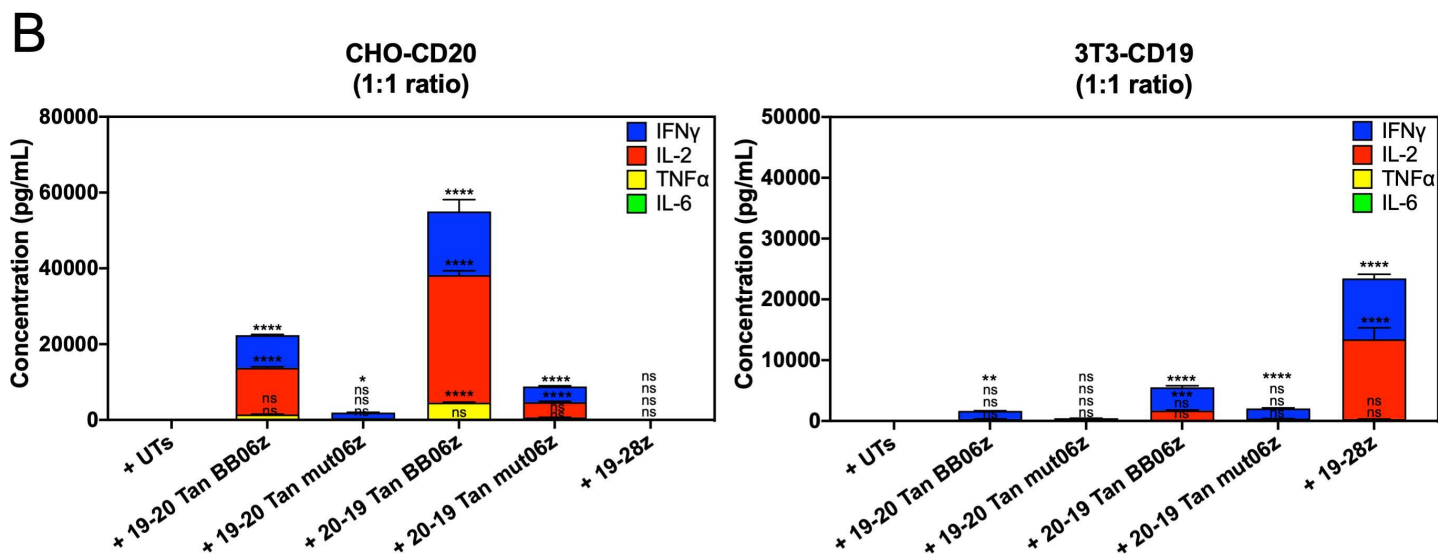

Supplement: jitc-2021-003354supp003.pdf [file jitc-2021-003354supp003.pdf]

A

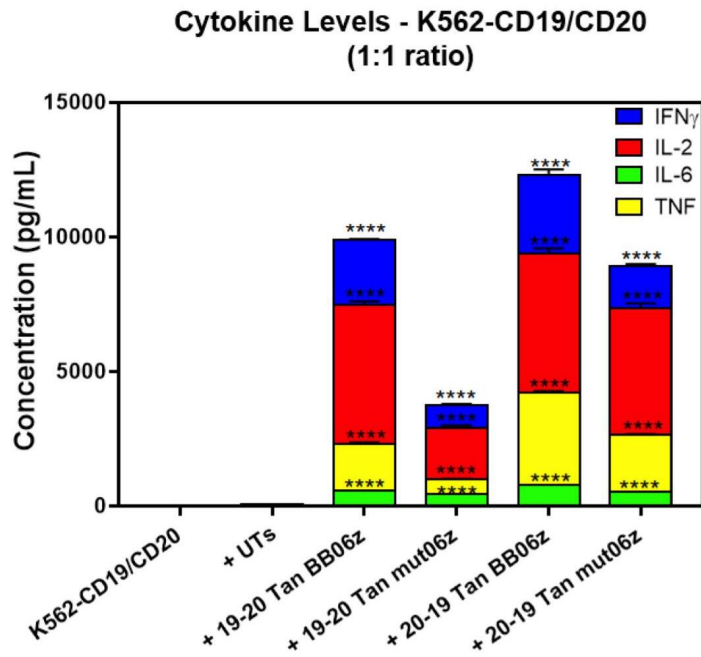

B

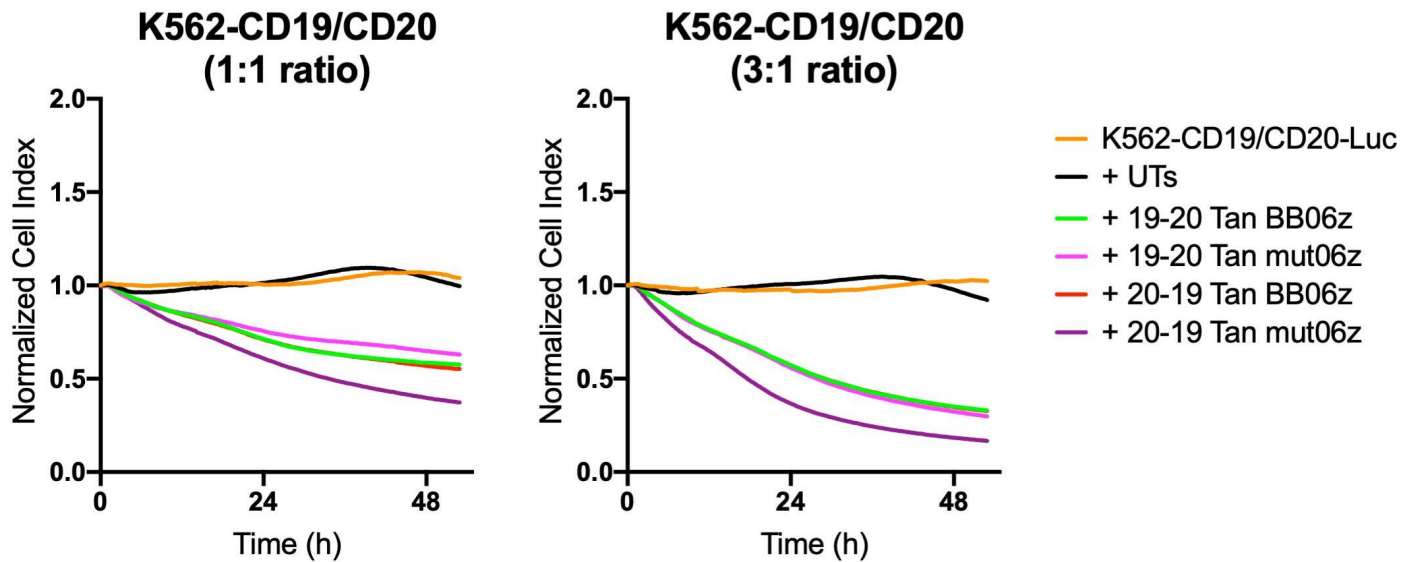

Supplement: jitc-2021-003354supp004.pdf [file jitc-2021-003354supp004.pdf]

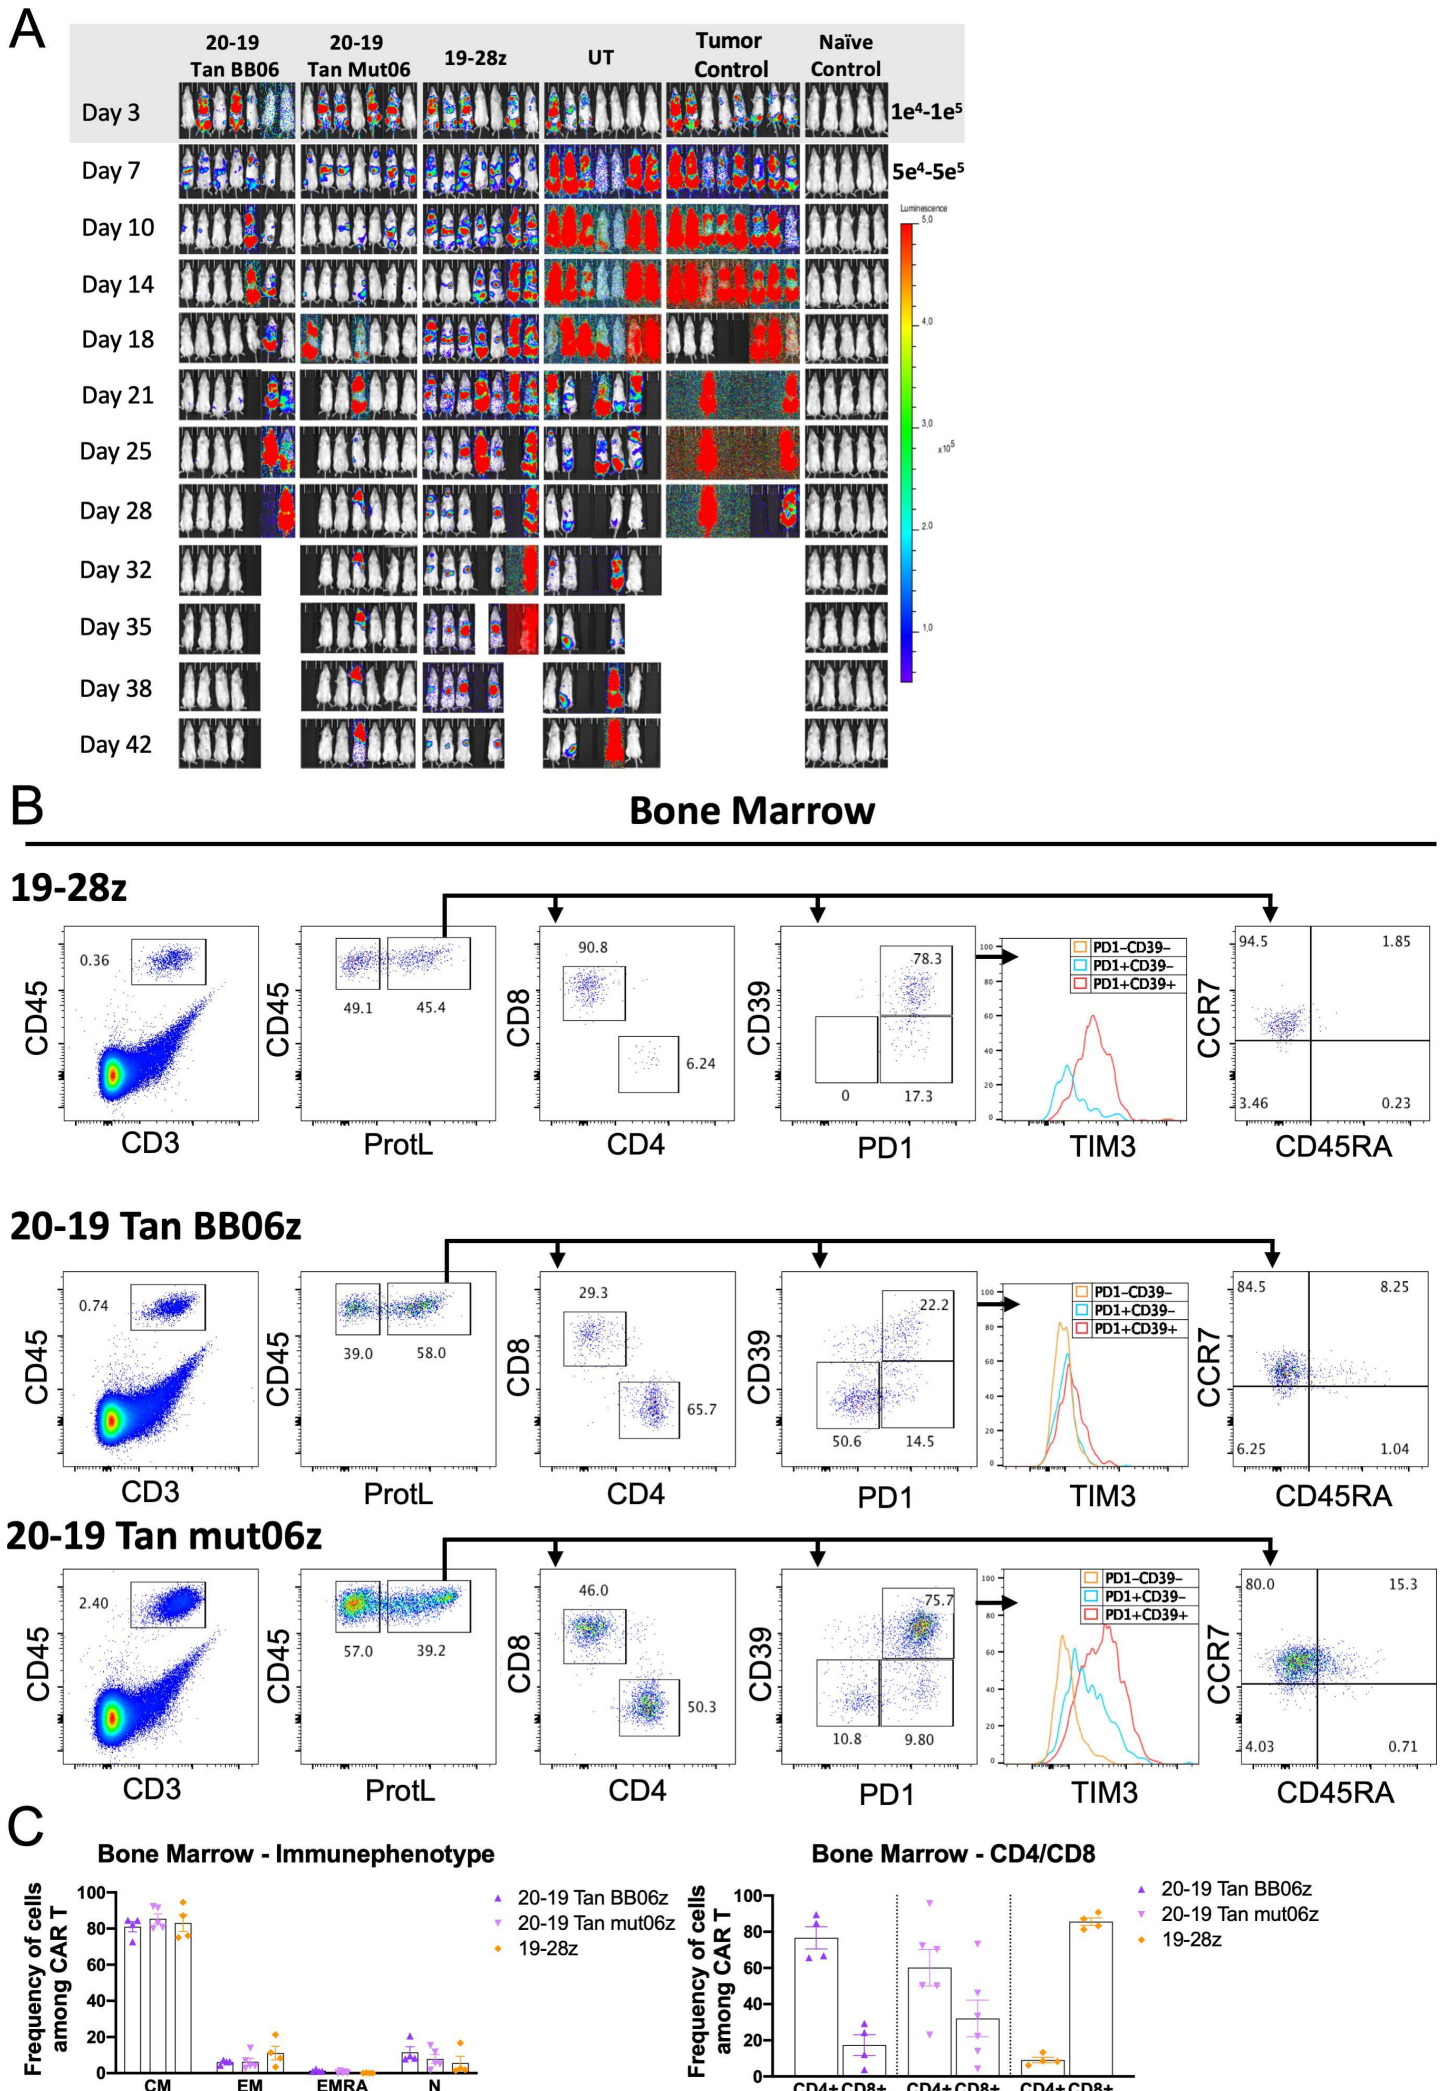

Supplement: jitc-2021-003354supp005.pdf [file jitc-2021-003354supp005.pdf]

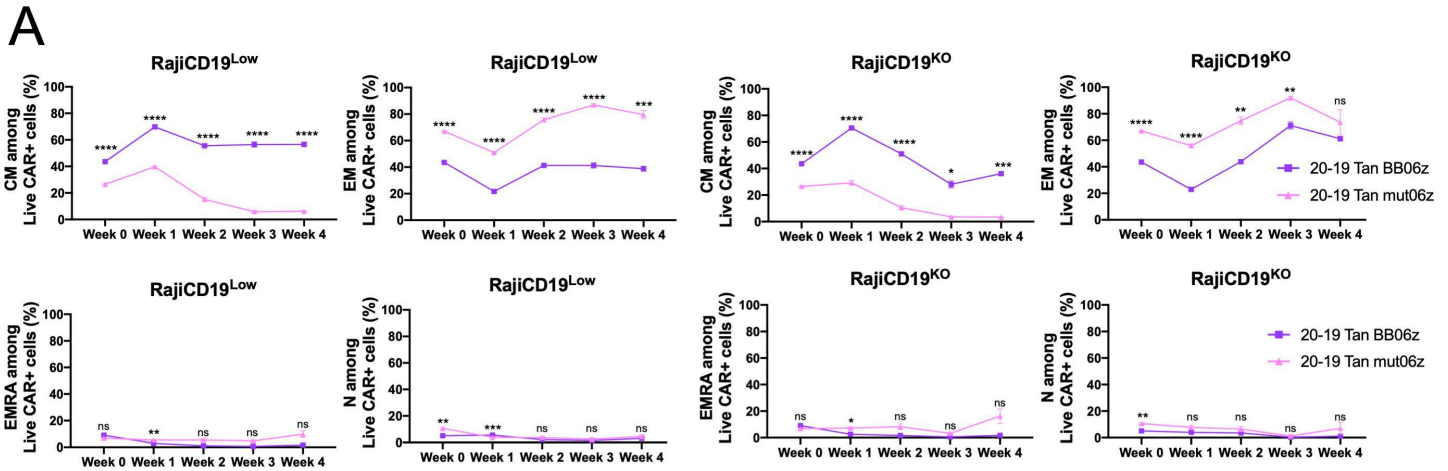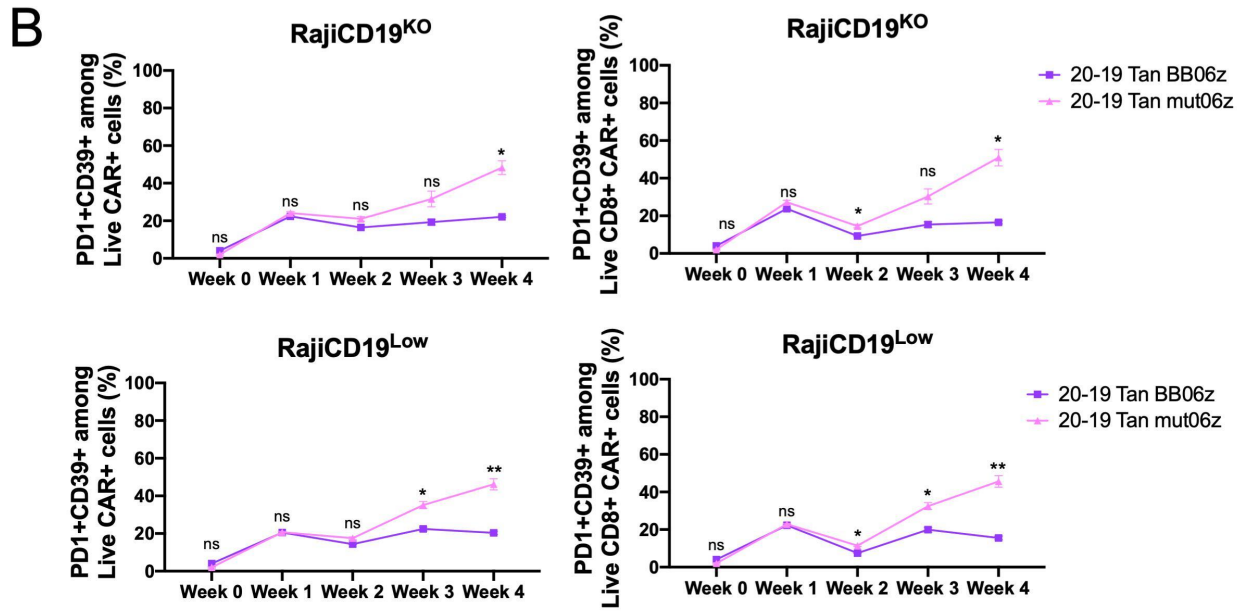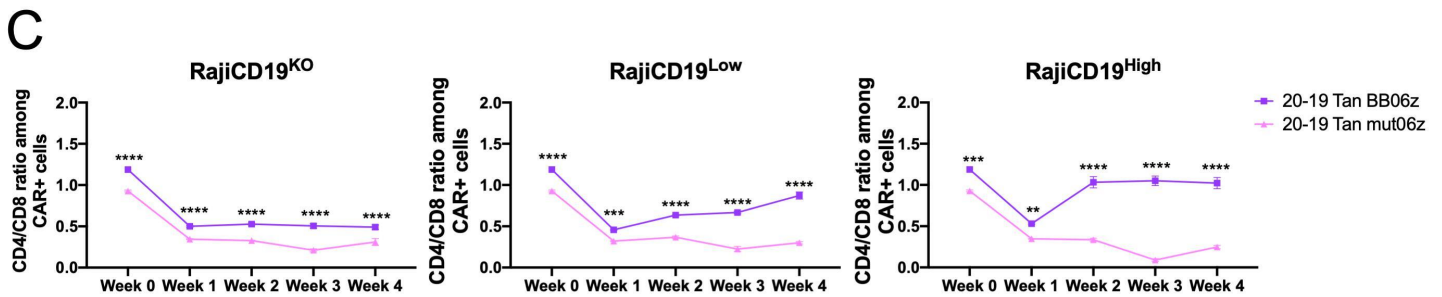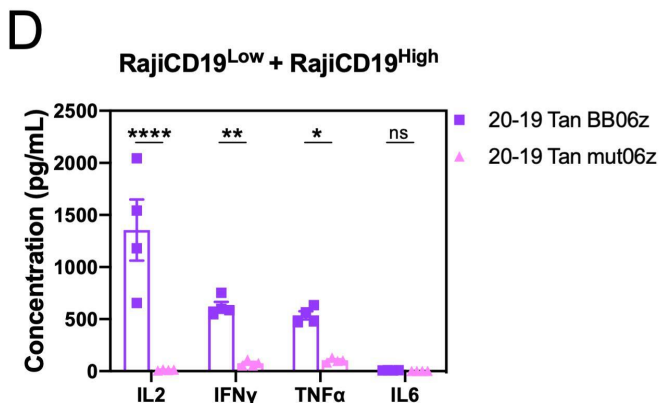

Supplement: jitc-2021-003354supp007.pdf [file jitc-2021-003354supp007.pdf]
